# Supplementary material for: Integrated multimodality microscope for accurate and efficient target-guided cryo-lamellae preparation
Source: PubMed Central journal article supplement (PMC9911353; doi:10.1038/s41592-022-01749-z), 2023-01-16
Supplement: 41592_2022_1749_MOESM1_ESM.pdf [file 41592_2022_1749_MOESM1_ESM.pdf]

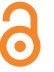

---

# Integrated multimodality microscope for accurate and efficient target-guided cryo-lamellae preparation

---

In the format provided by the authors and unedited

---

1

## Supplementary Information

|                               |                                                                                 |
|-------------------------------|---------------------------------------------------------------------------------|
| <b>Supplementary Figure 1</b> | Architecture and setup of the CLIEM system                                      |
| <b>Supplementary Figure 2</b> | Optical and mechanical design of the integrated confocal microscope             |
| <b>Supplementary Figure 3</b> | Optical performance of the integrated confocal microscope                       |
| <b>Supplementary Figure 4</b> | Custom-built cryogenic sample loading module based on the Gatan 910 cryo-holder |
| <b>Supplementary Figure 5</b> | Determination of the TOI position to the prelamella boundaries                  |
| <b>Supplementary Figure 6</b> | Fluorescence images of the LD-mitochondria reporter                             |
| <b>Supplementary Figure 7</b> | Fluorescence images of the MERC reporter                                        |
| <b>Supplementary Note 1</b>   | Optical performance of the integrated confocal microscope                       |
| <b>Supplementary Note 2</b>   | Cryogenic sample loading module and workflow                                    |
| <b>Supplementary Table 1</b>  | Parameters of cryo-ET data collation                                            |
| <b>Supplementary Table 2</b>  | Success rate of targeted-FIB milling of biological samples                      |

2

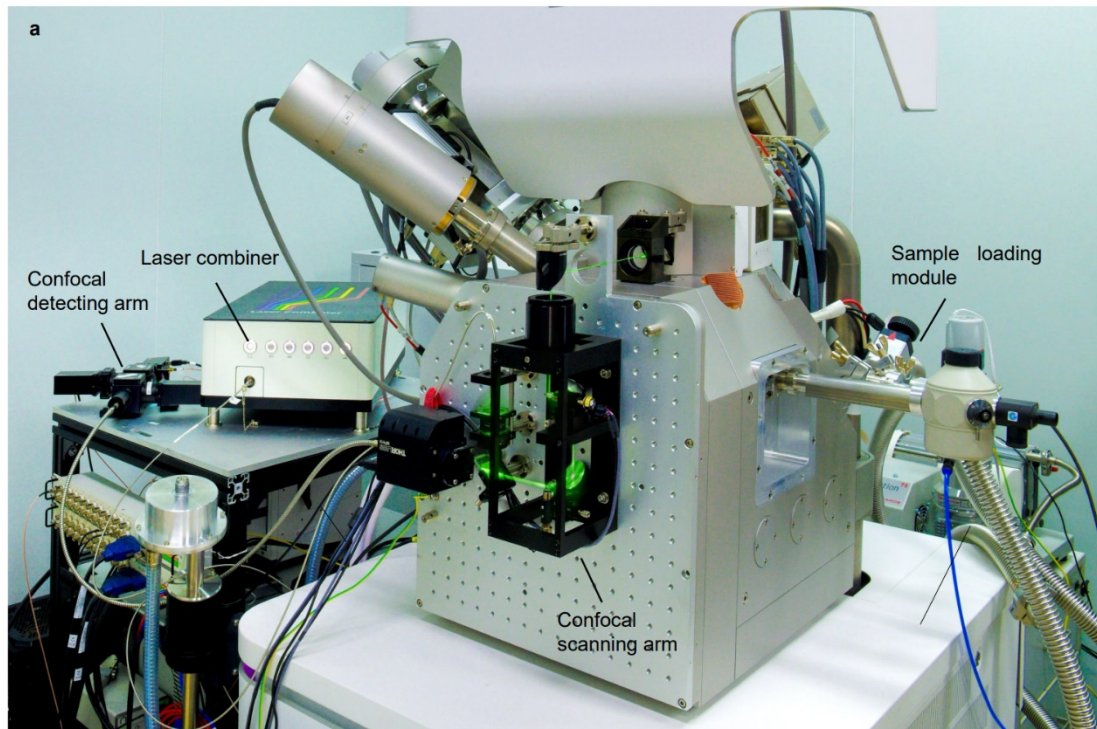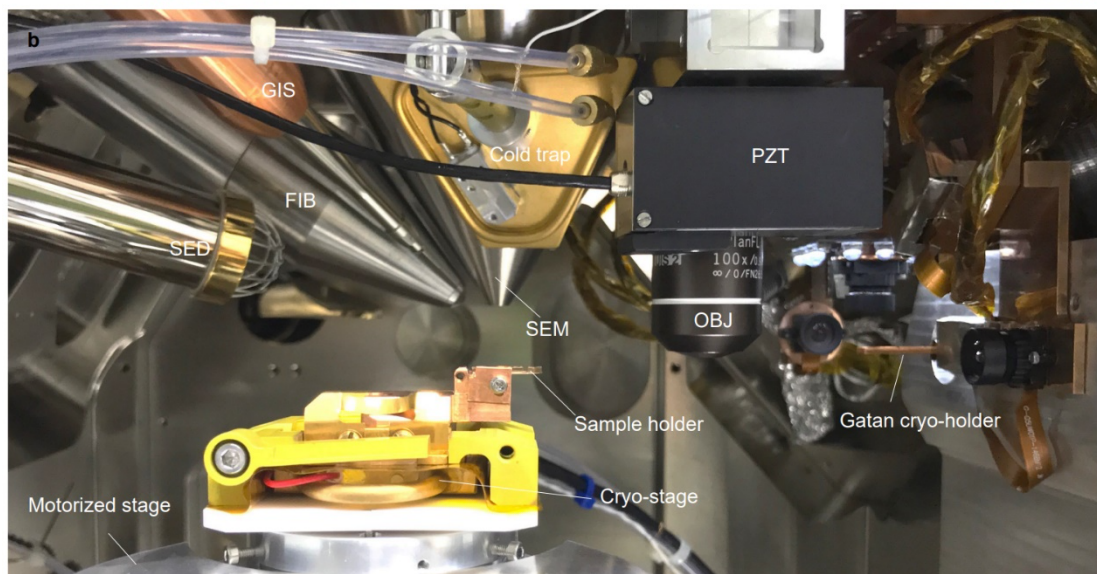

3

4 **Supplementary Figure 1. Architecture and setup of the CLIEM system.**

5 **a**, A photograph of the exterior of the CLIEM system. **b**, A photograph of the interior of the CLIEM

6 system.

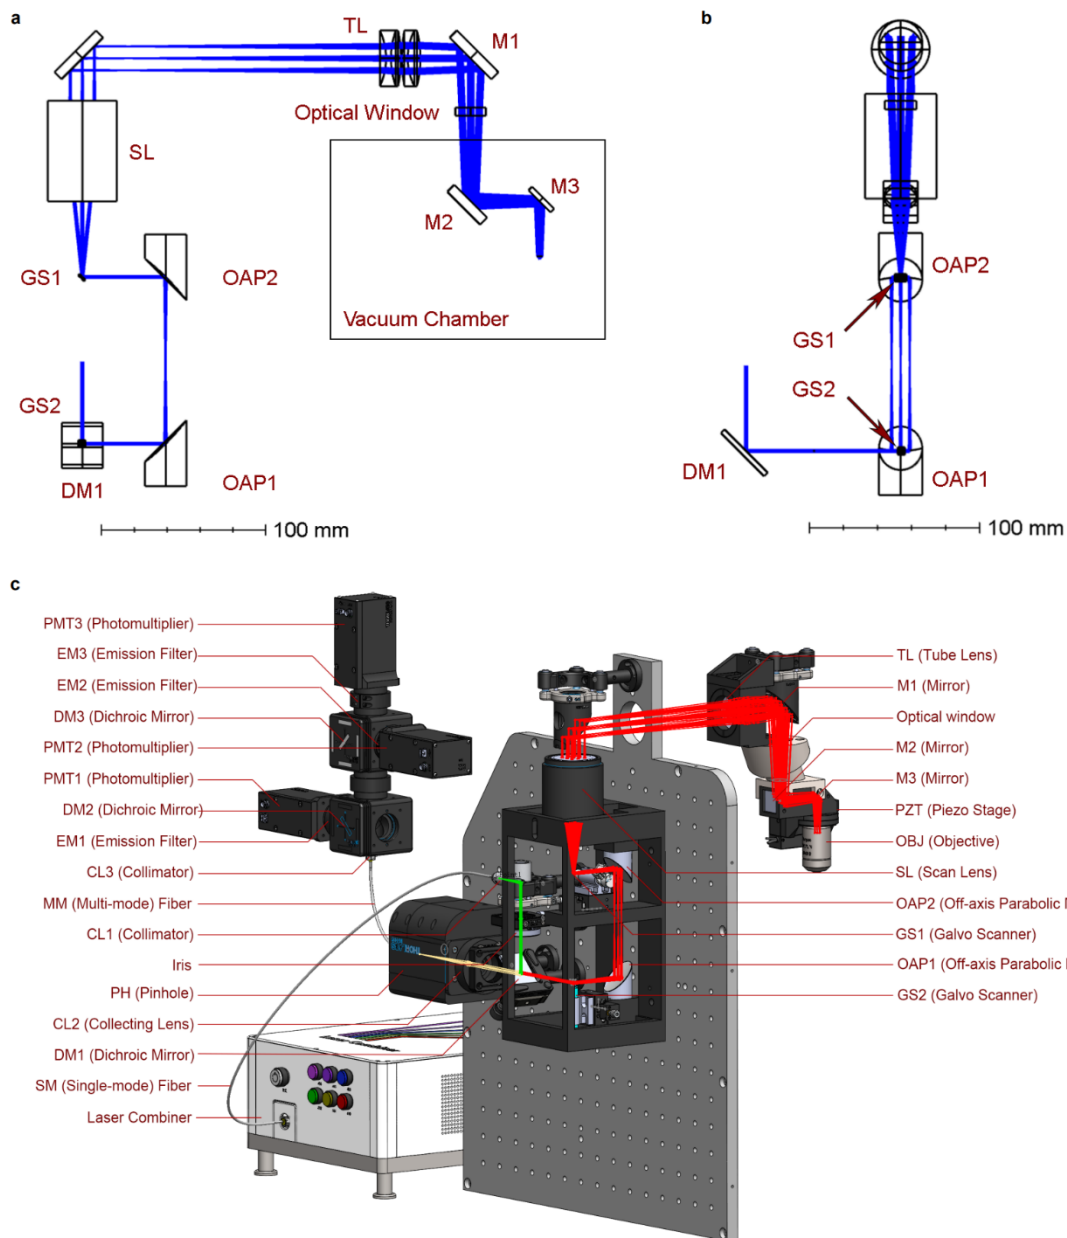

7

8 **Supplementary Figure 2. Optical and mechanical design of the integrated confocal microscope.**

9 **a**, Side view of the optical path design of the confocal microscope. **b**, Top view of the optical path

10 design of the confocal microscope. **c**, 3D rendering of the integrated confocal microscope. 405 nm

11 Laser (WCP405-150FS-224, Pavilion Integration Corp.), 488 nm Laser (WCP488-150FS-224, Pavilion

12 Integration Corp.), 532 nm Laser (WCP532-100FS-224, Pavilion Integration Corp.), 561 nm Laser (LS

13 150 mW, OBIS), 638 nm Laser (WCP405-150FS-224, Pavilion Integration Corp.), Fiber Coupler

14 (HPUC-23AF-400/700-P-4.5AC-15, OZ Optics), SM Fiber (QPMJ-3AF3S-400-3/125-3AS-3-1, OZ

15 Optics), Collimator (RC08FC-P01, Thorlabs Inc.), Iris (SM1D12SZ, Thorlabs Inc.), DM1

16 (ZT405/488/561/647-rpc, Chroma), GS1, GS2 (6215H, Cambridge Technology), OAP1,OAP2

17 (MPD129-P01, Thorlabs Inc.), SL (CLS-SL, Thorlabs Inc.), TL (SWTLU-S, Olympus), Optical Window

18 (10Q20RAR.L, Newport), PZT (nPFocus250HV, nPoint Inc.), OBJ (MPLFLN 100× NA0.9, Olympus),  
19 PH (MPH16, Thorlabs Inc.), MM fiber (customized, NA0.22, core diameter 1000 μm), DM2  
20 (T550lpxr, Chroma), DM3 (T635lpxr, Chroma), EM1 (ZET405/488m, Chroma), EM2 (ZET488/561m,  
21 Chroma), EM3 (ZET405/488/561/640m or ZET405/488/561, Chroma), PMT1, PMT2, PMT3  
22 (PMT2101/M, Thorlabs Inc.).

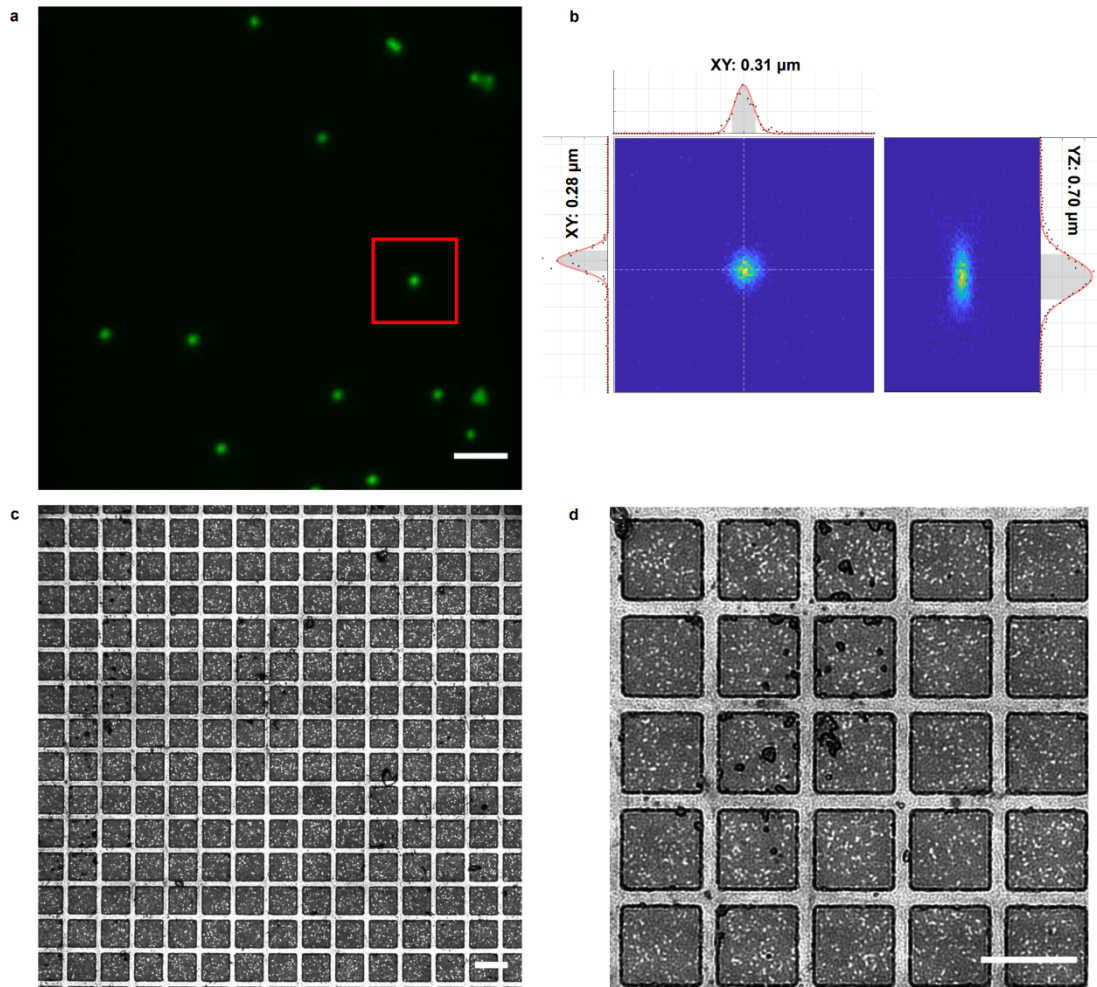

23

24 **Supplementary Figure 3. Optical performance of the integrated confocal microscope.**

25 **a**, Fluorescence image of 0.2  $\mu\text{m}$  fluorescent beads (T7280, TetraSpeck, Thermo Fisher Scientific)  
 26 for resolution calibration using Olympus MPLFLN 100 $\times$  NA 0.9 objective. A 488 nm Laser was used  
 27 for excitation and PMT1 was used for detection. The X, Y, and Z pixel sizes were 34.7 nm, 34.7 nm,  
 28 and 50 nm, respectively. One bead (boxed) was chosen for resolution calibration. Scale bar, 2  $\mu\text{m}$ .

29 **b**, 3D resolution determination of the integrated confocal microscope. PSF was analyzed in Matlab  
 30 2017b using opensource code (Rob Campbell, measurePSF,  
 31 <https://github.com/raacampbell/measurePSF>, GitHub). The full width half maximum (FWHM) of  
 32 Gaussian fitted curves along X-Y, Y-X, and Y-Z directions were 0.31  $\mu\text{m}$ , 0.28  $\mu\text{m}$ , and 0.70  $\mu\text{m}$ ,  
 33 resulting in the lateral and axial resolutions of 295 nm and 700 nm, respectively. Ten experiments  
 34 were repeated independently with similar results. **c,d**, Confocal BF images of a calibration target  
 35 (Thorlabs, R1L3S5P) for FOV and pixel size calibration, showing an FOV of 145  $\mu\text{m}$  x 145  $\mu\text{m}$  in **c**  
 36 and 50  $\mu\text{m}$  x 50  $\mu\text{m}$  in **d**. Scale bar in **c, d**, 10  $\mu\text{m}$ .

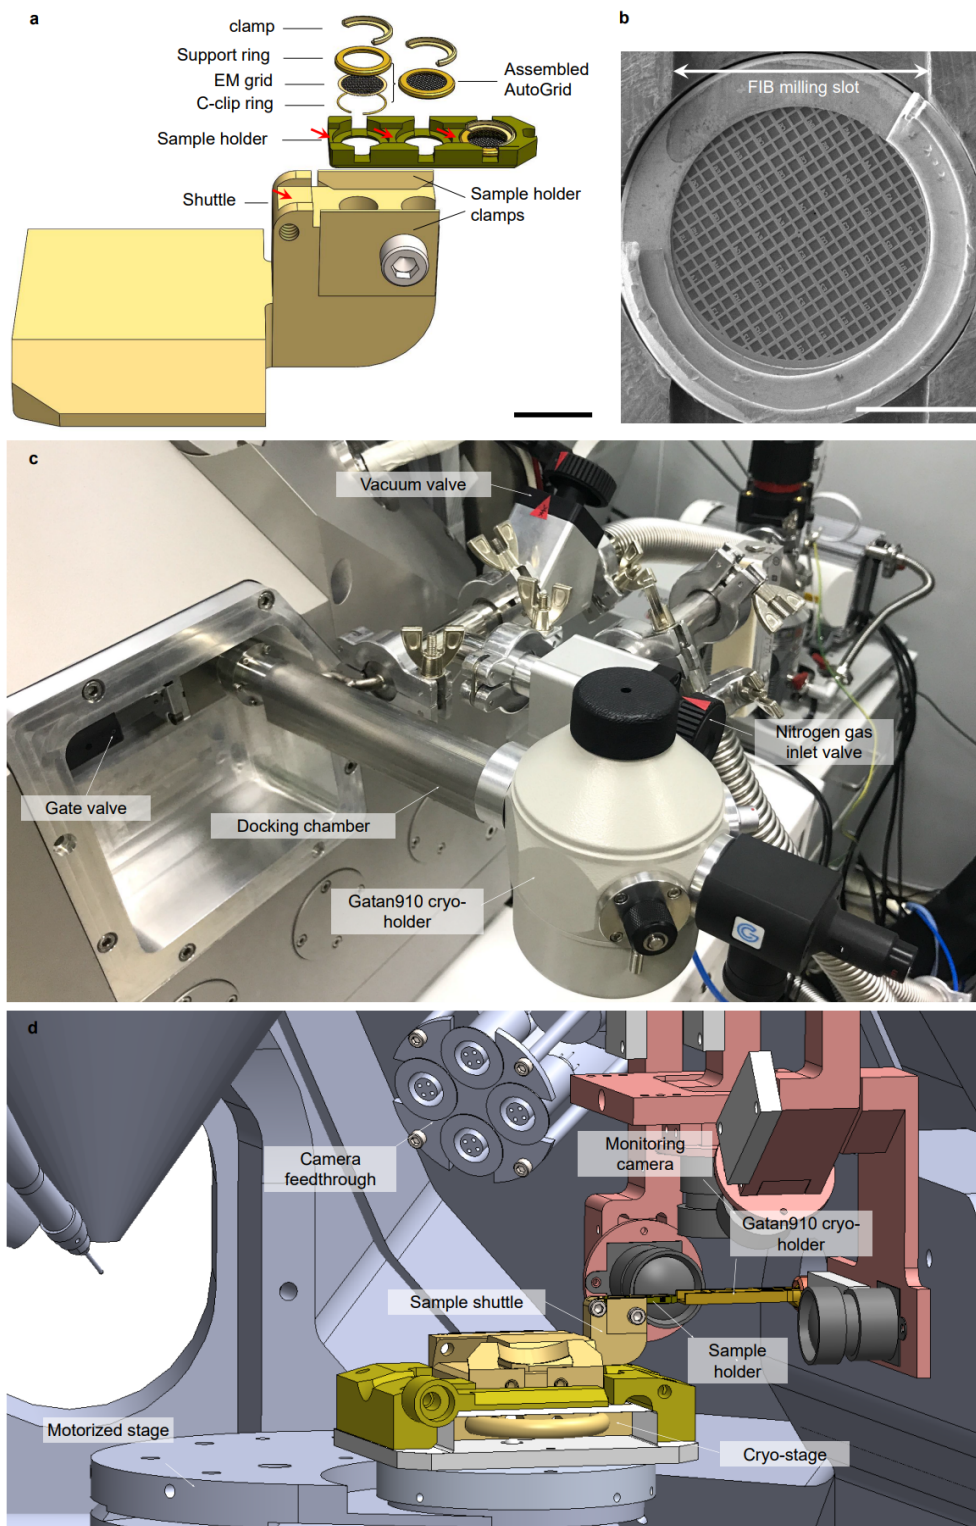

37

38 **Supplementary Figure 4. Custom-built cryogenic sample loading module based on the Gatan 910**  
 39 **cryo-holder.**

40 **a**, 3D rendering of the custom-designed sample holder, which accommodated three AutoGrid  
 41 samples. Slots (arrows) were made on the sample holder and the shuttle to let FIB through during  
 42 milling. Scale bar 5  $\mu\text{m}$ . **b**, An SEM micrograph of an AutoGrid mounted in the sample holder,

43 displaying the FIB milling slot. Scale bar 1 mm. **c**, A photograph of the sample loading module  
44 outside the vacuum chamber. **d**, 3D rendering of the sample loading module inside the vacuum  
45 chamber.  
46



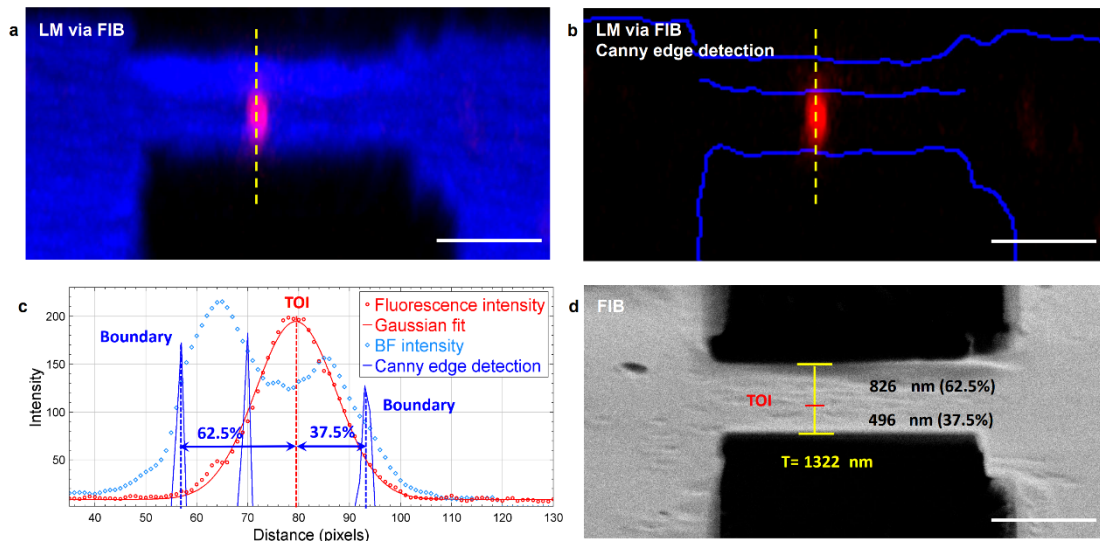

48

49 **Supplementary Figure 5. Determination of the TOI position to the prelamella boundaries.**

50 **a**, LM via FIB of the prelamella. To obtain the LM via FIB image, raw 3D images were first tilted 72  
 51 degrees using Fiji (Volume Viewer plugin) in Max Projection display mode. Interpolation was  
 52 performed using the Tricubic sharp algorithm in Volume Viewer plugin with a Z-aspect of 4.046.  
 53 The yellow dashed line indicates the position for intensity profile analysis in **c**. **b**, LM via FIB after  
 54 Canny edge detection on BF image. Edge detection was performed on the BF image using Canny  
 55 Edge Detector plugin of Fiji with the following parameters. Gaussian kernel radius 3.5, Low  
 56 threshold 2.5, and High threshold 7.0. The BF image after edge detection was merged with  
 57 fluorescence image. The yellow dashed line indicates the position for intensity profile analysis in **c**.  
 58 **c**, Line profile across the TOI in **a** and **b**. The red circles represent the intensity of the fluorescence  
 59 image, and the red line represents the Gaussian fitted curve to the fluorescence profile. The blue  
 60 diamonds represent the intensity of the BF image, and the blue lines show the profile of the BF  
 61 image after edge detection. TOI's position was determined from the peak of the fitted curve as  
 62 79.5, and the positions of the boundaries were determined from the peaks of the edge detection  
 63 as 57 and 93, respectively. The relative position of the TOI with respect to the boundaries was  
 64 measured in percentage as 62.5% and 37.5%, respectively. **d**, FIB image of the prelamella. The  
 65 thickness (T) of the pre-lamella was measured with nanometer precision in the FIB-SEM control  
 66 software, and the TOI position was determined according to the measured relative position in **c**.  
 67 The thickness of the prelamella measured in LM via FIB was 1780 nm, while 1322 nm in the FIB

68 image. The difference results from the fitting error in LM via FIB image and manual measurement  
69 error in FIB image. Therefore, the relative position of the TOI to the boundaries in percentage was  
70 used as the guidance to determine the TOI position in the FIB image. Scale bar, 2  $\mu\text{m}$   
71

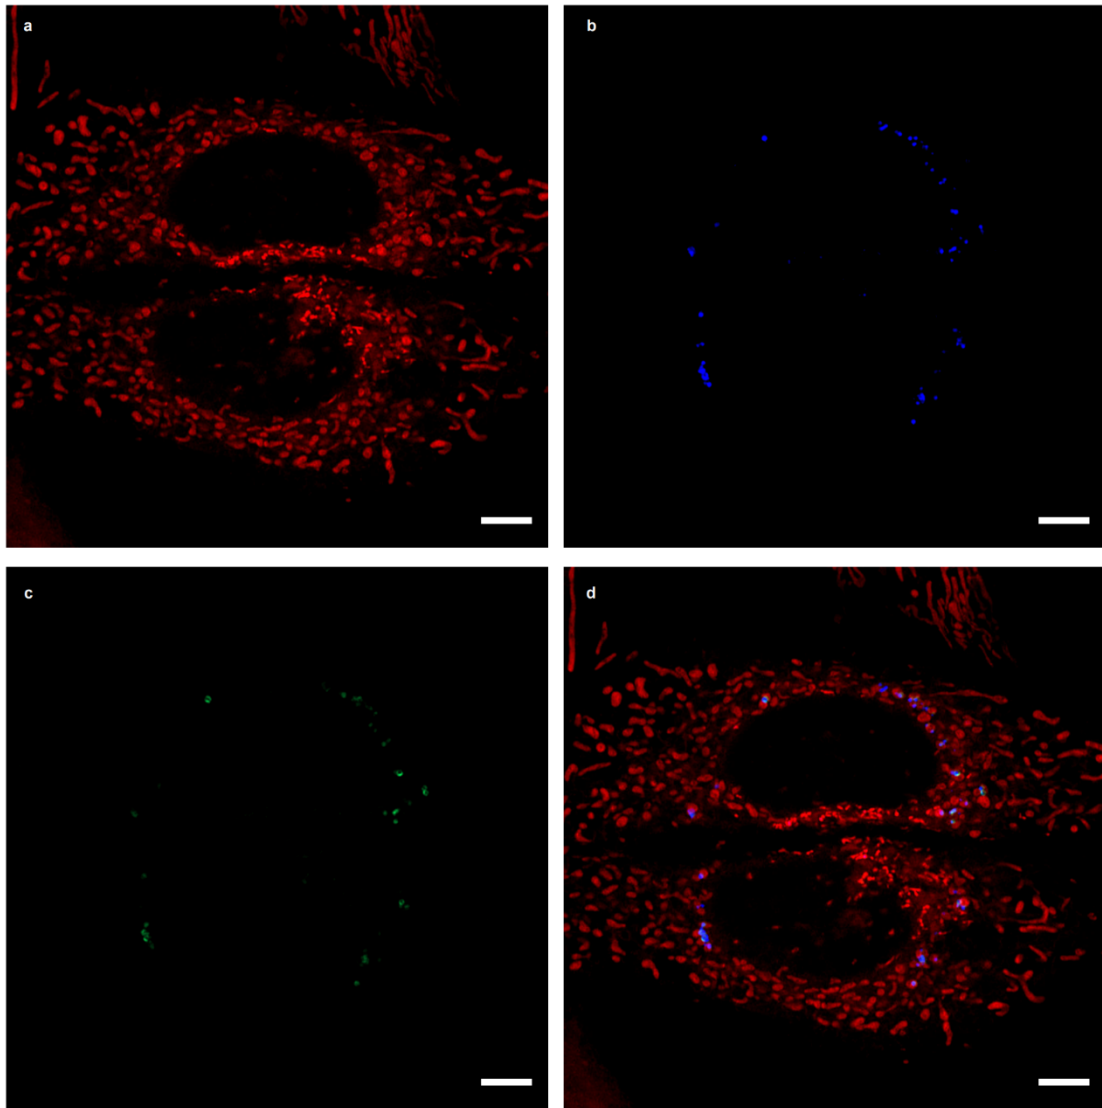

72

73 **Supplementary Figure 6: Fluorescence images of the LD-mitochondria reporter.**

74 The HepG2 cells with LD-mitochondria reporter were incubated with MitoTracker and LipidTox to  
75 stain mitochondria and lipid droplets, respectively. The fluorescence images were acquired with a  
76 Zeiss LSM980 microscope equipped with a 63x / NA1.40 oil immersion objective (Zeiss). **a**,  
77 MitoTracker. **b**, LipidTox. **c**, GFP. **d**, Merge. Scale bar, 5  $\mu$ m. Five experiments were repeated  
78 independently with similar results.

79

80

81

82

83

84

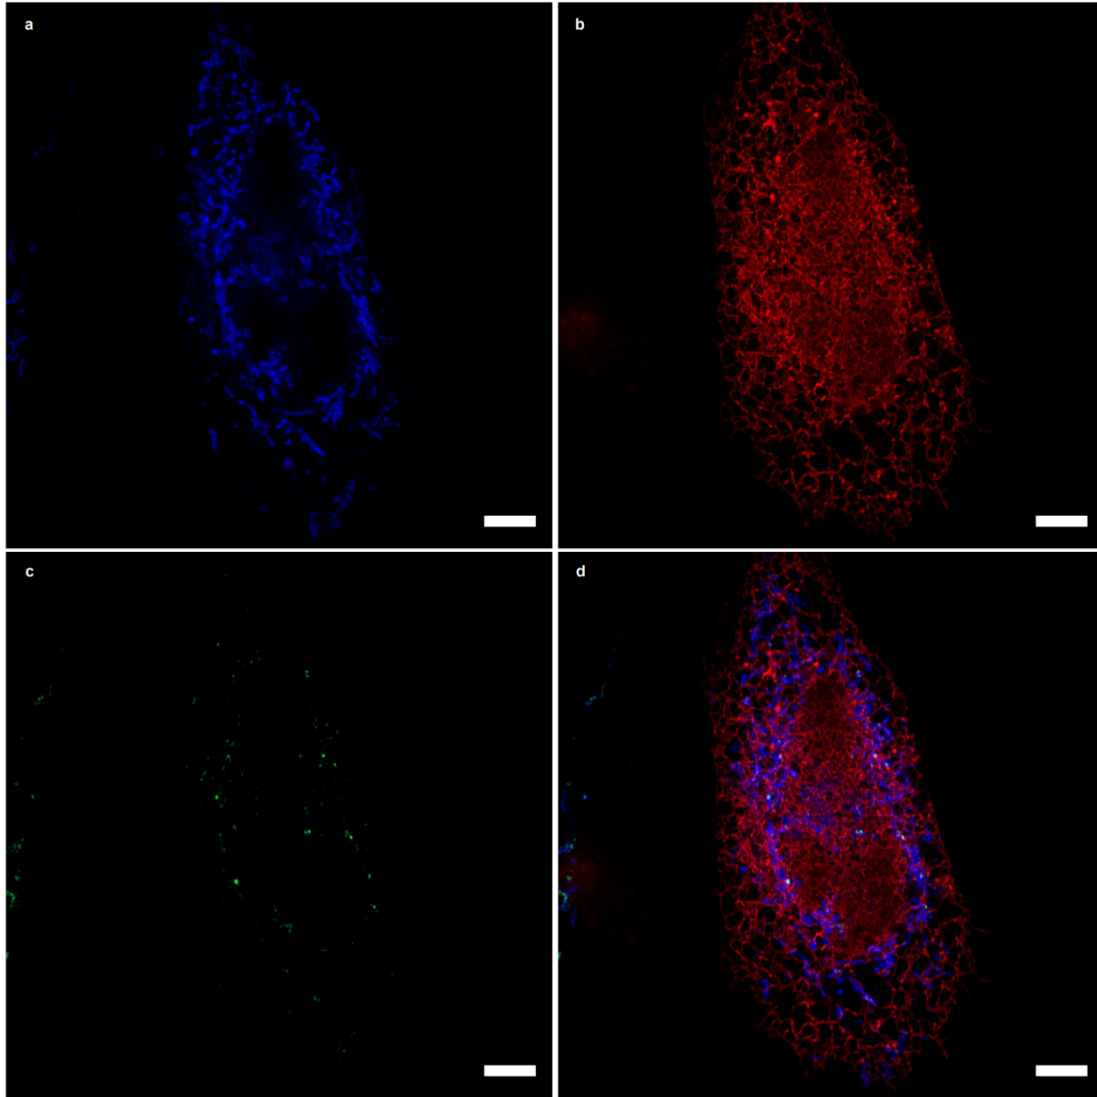

85

86 **Supplementary Figure 7. Fluorescence images of the MERC reporter.**

87 The HepG2 cells with MERC reporter were transiently transfected with ER-DsRed for ER labeling  
88 and then incubated with MitoTracker to stain mitochondria. The fluorescence images were  
89 acquired with the Zeiss LSM980 microscope equipped with a 63x/1.40 NA oil immersion objective  
90 (Zeiss). **a**, MitoTracker. **b**, ER-DsRed. **c**, GFP. **d**, Merge. Scale bar, 5  $\mu\text{m}$ . Five experiments were  
91 repeated independently with similar results.

92

93

94

95 **Supplementary Note 1: Optical performance of the integrated confocal microscope.**

96 **Optical resolution evaluation.** To calibrate the resolution of the optical system, fluorescent beads  
97 with a diameter of 0.2  $\mu\text{m}$  were diluted and spread on a 400 mesh copper EM grid (BZ11024a,  
98 Beijing Zhongjingkeyi Technology Co., Ltd.). Then the beads were imaged under cryogenic  
99 conditions with a dry objective (MPLFLN 100 $\times$  NA 0.9, Olympus) using a 488 nm excitation  
100 wavelength, a 25  $\mu\text{m}$  pinhole size, and X, Y, and Z pixel sizes of 34.7 nm, 34.7 nm, and 50 nm,  
101 respectively (Supplementary Fig. 3a). Gaussian fitting was performed in the X-Y, Y-X, and Y-Z  
102 directions, and the full width half maximum (FWHM) was calculated. The lateral resolution was  
103 measured as the averaged FWHM of X-Y and Y-X to be 295 nm, whereas the axial resolution was  
104 measured as the FWHM of Y-Z to be 700 nm (Supplementary Fig. 3b).

105  
106 **FOV and pixel size calibration.** The optical window that is mounted on the vacuum flange limited  
107 the system's nonvignetted field of view to 145  $\mu\text{m}$  x 145  $\mu\text{m}$  when using an Olympus 100X objective  
108 (Supplementary Fig. 3c). The physical size of FOV was calibrated using a standard target (Thorlabs,  
109 R1L3S5P). The flexibility of FOV adjustment is shown by acquiring a small FOV of 50  $\mu\text{m}$  x 50  $\mu\text{m}$   
110 (Supplementary Fig. 3d). The pixel size was calibrated by measuring the distance in pixels and in  
111 real sizes based on the image of the standard target.

112  
113 **Supplementary Note 2: Cryogenic sample loading module and workflow.**

114 We have designed a special sample holder (Supplementary Fig. 4a) to load three standard  
115 AutoGrids onto the cryostage. The AutoGrids were mounted in the sample holder with the support  
116 ring facing up, and were fixed by clamps. The distance from the upper surface of the sample holder  
117 to the surface of the EM grid is approximately 0.5 mm, which was within the WD of the objective  
118 used (NA0.9, WD 1 mm). The sample holder could slide onto the shuttle and be fixed in position  
119 by two clamps. The sample holder and the shuttle also had FIB milling slots that provide space for  
120 the FIB during milling (Supplementary Fig. 4b). Furthermore, we designed a docking module for  
121 sample loading without breaking the vacuum of the system.

122 During sample loading, the Gatan 910 holder was first inserted into the docking chamber  
123 (Supplementary Fig. 4c), and vacuum was generated in the chamber. The gate valve was then  
124 opened, and the cryo-holder was inserted into the vacuum chamber. Afterward, the sample holder  
125 could be loaded/unloaded onto/from the sample shuttle by moving the motorized stage  
126 (Supplementary Video 2). Three cameras were used to monitor the manual movement of the cryo-  
127 stage (Supplementary Fig. 4d). When removing the cryo-holder from the vacuum chamber, the  
128 reverse process was performed, and dry Nitrogen gas was fed into the docking chamber to  
129 eliminate the vacuum and prevent ice formation on the sample.

130

131 **Supplementary Table 1. Parameters of cryo-ET data collection**

|                                   | LD-mitochondria  | MERC             | Centrosome       |
|-----------------------------------|------------------|------------------|------------------|
| Microscope                        | Titan Kris G2    | Titan Krios G2   | Titan Krios G2   |
| Operation voltage (kV)            | 300              | 300              | 300              |
| Detector                          | Gatan K2         | Gatan K2         | Gatan K2         |
| Mode                              | Counting         | Counting         | Counting         |
| Frame rate (fps)                  | 10               | 16               | 10               |
| Magnification                     | 26,000 x         | 26,000 x         | 33,000 x         |
| Pixel size (Å)                    | 5.42             | 5.42             | 4.3              |
| Exposure time (s)                 | 4.5              | 4.8              | 3                |
| Tilting angle (°)                 | -54 - 48         | -40 - 60         | -40 - 36         |
| Angle increment (°)               | 3                | 2.5              | 2                |
| Dose per tilt (e/Å <sup>2</sup> ) | 105              | 123              | 117              |
| Defocus (µm)                      | -6               | -6               | -5               |
| Direction                         | Unidirectionally | Unidirectionally | Unidirectionally |

132

133 **Supplementary Table 2. Success rate of targeted-FIB milling of biological samples**

|                                                        | LD-mitochondria | MERC | Centrosome | Overall |
|--------------------------------------------------------|-----------------|------|------------|---------|
| Number of prepared lamellae                            | 31              | 5    | 6          | 42      |
| Number of prepared lamellae containing desired feature | 29              | 5    | 6          | 40      |
| Success rate                                           | 94%             | 100% | 100%       | 95%     |

134
